# Supplementary material for: LAWS OF FORMATION OF METATSTABLE PHASE IN TITANIUM ALLOYS
Source: JCI journal article supplement (doi:10.1172/jci43326), 1958-10-01
Supplement: sd1 [file 1]

## **Supplement: Infusing mature megakaryocytes into mice yields functional platelets**

Rudy Fuentes<sup>1,3</sup>, Yuhuan Wang<sup>3</sup>, Jessica Hirsch<sup>3</sup>, Cheng Wang<sup>3</sup>, Lubica Rauova<sup>2,3</sup>, G. Scott Worthen<sup>4</sup>, M. Anna Kowalska<sup>3</sup>, Mortimer Poncz<sup>2,3</sup>

Departments of <sup>1</sup>Pharmacology and <sup>2</sup>Pediatrics, University of Pennsylvania School of Medicine; and The Divisions of <sup>3</sup>Hematology and <sup>4</sup>Neonatology, Department of Pediatrics, The Children's Hospital of Philadelphia.

Correspondence:

Mortimer Poncz, MD

Children's Hospital of Philadelphia

3615 Civic Center Blvd

Philadelphia, PA 19104

Tel: 215-590-3574

Fax: 215-267-5476

[poncz@email.chop.edu](mailto:poncz@email.chop.edu)

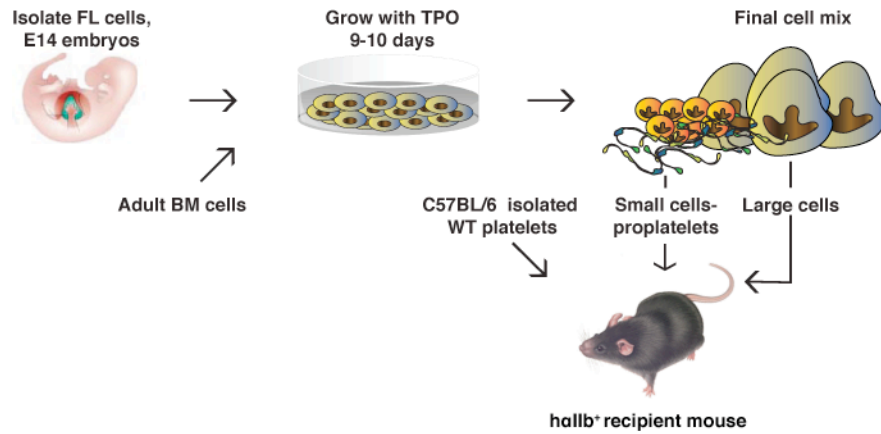

### Figure 1supplement. Isolation of FL and BM derived megakaryocytes

The strategy followed in our study is presented by which the three different products for infusion were collected: isolated WT platelets, large and small cells were obtained from FL cells grown in the presence of TPO. Flow cytometric analysis of whole blood from h<sub>IIb</sub><sup>+</sup> recipient mice before and at different time points after infusion of donor cells was performed. Blood was stained with labeled species-specific anti-<sub>IIb</sub> antibodies. The % of platelets in the left upper quadrant represents the recipient's platelets, while the % in the right lower quadrant represents donor-derived platelets.

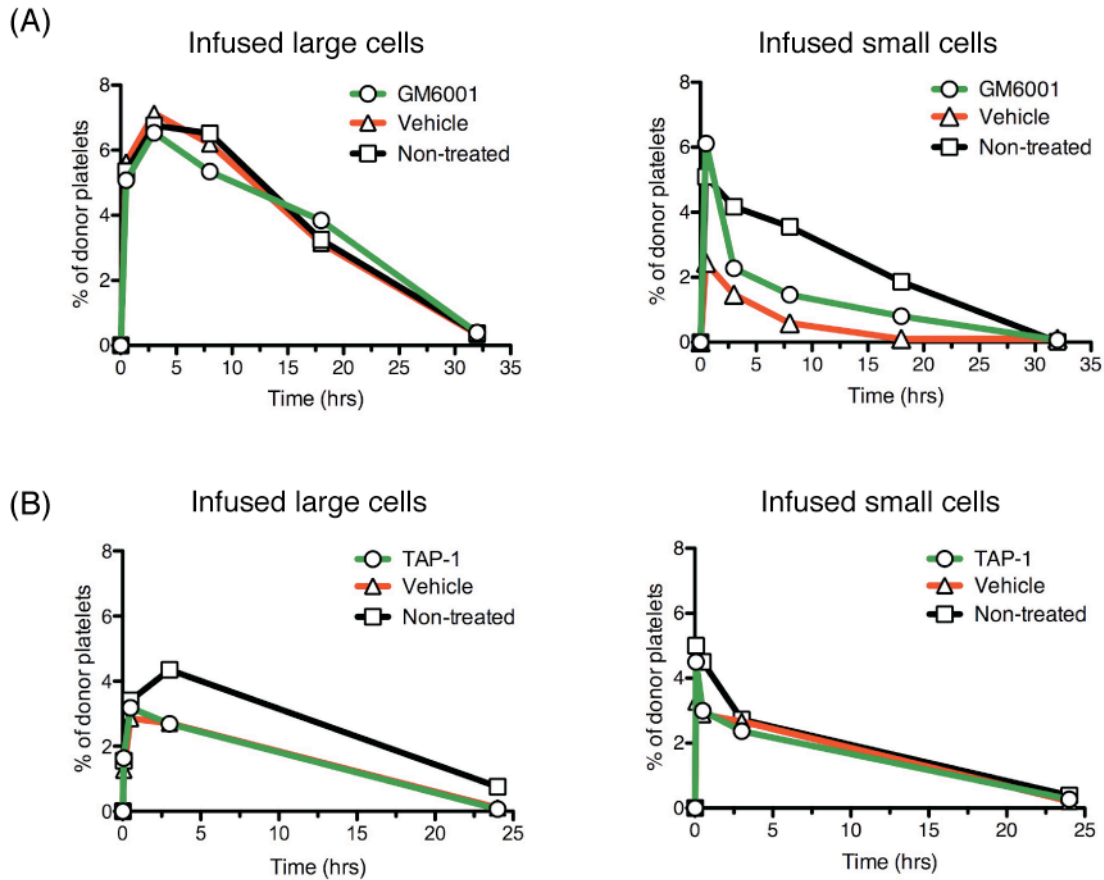

**Figure 2supplement. Effect of metalloproteinase on thrombopoiesis from in vitro grown FL-derived cells.**

WT FL-cells were grown in culture in the presence of either 100  $\mu$ M GM6001 (A) or 10  $\mu$ M TAP-1 (B) and then separated into small and large cells as in Fig. 1A and infused into h\_IIB<sup>+</sup> recipient mice to see if the metalloproteinase inhibitors improved the shortened half-life observed with non-treated derived platelets. N=2, performed in duplicates.

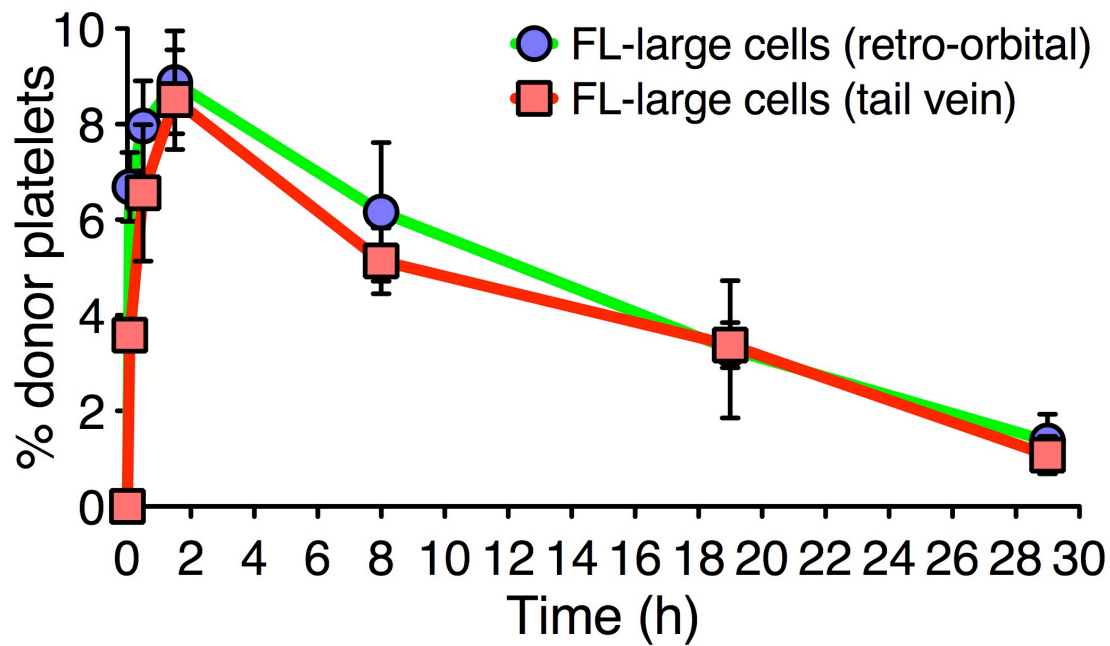

**Figure 3supplement. Comparison of retro-orbital Vs tail vein infusions of FL-large cells**  
Flow cytometric percentage of infused  $\sim 10^6$  FL-large cells in recipient animals. N=5 study per arm, Mean  $\pm$  1 standard deviation (SD) are shown.

**Table 1supplement. Calculation of number of alveoli capillaries blocked by infused megakaryocytes.**

---

Mice platelet content:  $1-2 \times 10^9$  platelets (1)

Mice platelet half-life: 37 hrs (2)

Megakaryocyte sheds  $10^2$  platelets (determined in this study).

---

*Calculate:  $2-4 \times 10^6$  megakaryocytes each day traveling to the lungs to maintain the animal's platelet count.*

---

Mice alveoli:  $2.3 \times 10^6$  in both lungs (3)

Capillaries per alveoli: 25-100; based on human alveolar structure, corrected for the difference in volume between human and murine alveoli) (4)

---

*Calculate: Infusion of  $= 10^6$  megakaryocytes over 10 mins into the mice will block 0.4-1.7% of the entire capillary bed for a 24 hr period.*

---

**References:**

1. Schmitt, A., Guichard, J., Masse, J.M., Debili, N., and Cramer, E.M. 2001. Of mice and men: comparison of the ultrastructure of megakaryocytes and platelets. *Exp Hematol* 29:1295-1302.
2. Baker, G.R., Sullam, P.M., and Levin, J. 1997. A simple, fluorescent method to internally label platelets suitable for physiological measurements. *Am J Hematol* 56:17-25.
3. Knust, J., Ochs, M., Gundersen, H.J., and Nyengaard, J.R. 2009. Stereological estimates of alveolar number and size and capillary length and surface area in mice lungs. *Anat Rec (Hoboken)* 292:113-122.
4. Weibel, E.R., and Gomez, D.M. 1962. Architecture of the human lung. Use of quantitative methods establishes fundamental relations between size and number of lung structures. *Science* 137:577-585.

### **Supplemental movie legend**

#### **Video 1. Incorporation of donor platelets in arteriole thrombi of h\_IIB<sup>+</sup> recipient mouse after infusion of FL- small cells, following laser injury. (MOV 3.1 MB)**

As in Fig. 2C with an injury created near the center of the video and blood flow from top to bottom on the screen. The platelets depicted in green were detected with an anti-mouse CD41 antibody labeled with Alexa<sup>488</sup>. Incorporation of platelets from small cells into the thrombi was seen with a distinct population of CD41<sup>+</sup> cells re-circulating and rarely incorporated into the growing thrombus.

#### **Video 2. Incorporation of donor platelets in arteriole thrombi of h\_IIB<sup>+</sup> recipient mouse after infusion of FL-large cells, following laser injury. (MOV 3.1 MB)**

As in Fig. 2B with an injury created near the center of the video and blood flow from top to bottom on the screen. The platelets depicted in green were detected with an anti-mouse CD41 antibody labeled with Alexa<sup>488</sup>. Incorporation of platelets from the large cells into the growing thrombi was detected similar to infusion of WT platelets.

#### **Video 3. Incorporation of WT donor platelets in arteriole thrombi of h\_IIB<sup>+</sup> recipient mouse following laser injury. (MOV 3.1 MB)**

As in Fig. 2A with an injury created near the center of the video and blood flow from top to bottom on the screen. The platelets depicted in green were detected with an anti-mouse CD41 antibody labeled with Alexa<sup>488</sup>. Incorporation of the WT infused platelets into the growing thrombi was clearly detected.
